# Supplementary material for: Understanding thiol-induced etching of luminescent gold nanoclusters
Source: Royal Society of Chemistry journal article supplement (doi:10.1039/c4ra02111h), 2014-01-01
Supplement: c4ra02111h1.pdf [file c4ra02111h1.pdf]

## **Supporting Information**

### **Understanding Thiol-Induced Etching of Luminescent Gold Nanoclusters:**

#### **Control of Lyszyme Activity and Sensing of Thimerosal**

Chen-Yi Ke,<sup>1</sup> Tzu-Heng Chen,<sup>1</sup> Lin-Chen Lu,<sup>1</sup> and Wei-Lung Tseng<sup>\*1, 2</sup>

1. Department of Chemistry, National Sun Yat-sen University, Taiwan

2. School of Pharmacy, College of Pharmacy, Kaohsiung Medical University, Taiwan

Correspondence: Dr. Wei-Lung Tseng, Department of Chemistry, National Sun Yat-sen University, 70, Lien-hai Road, Kaohsiung, Taiwan 804.

E-mail: [tsengwl@mail.nsysu.edu.tw](mailto:tsengwl@mail.nsysu.edu.tw)

Fax: 011-886-7-3684046.

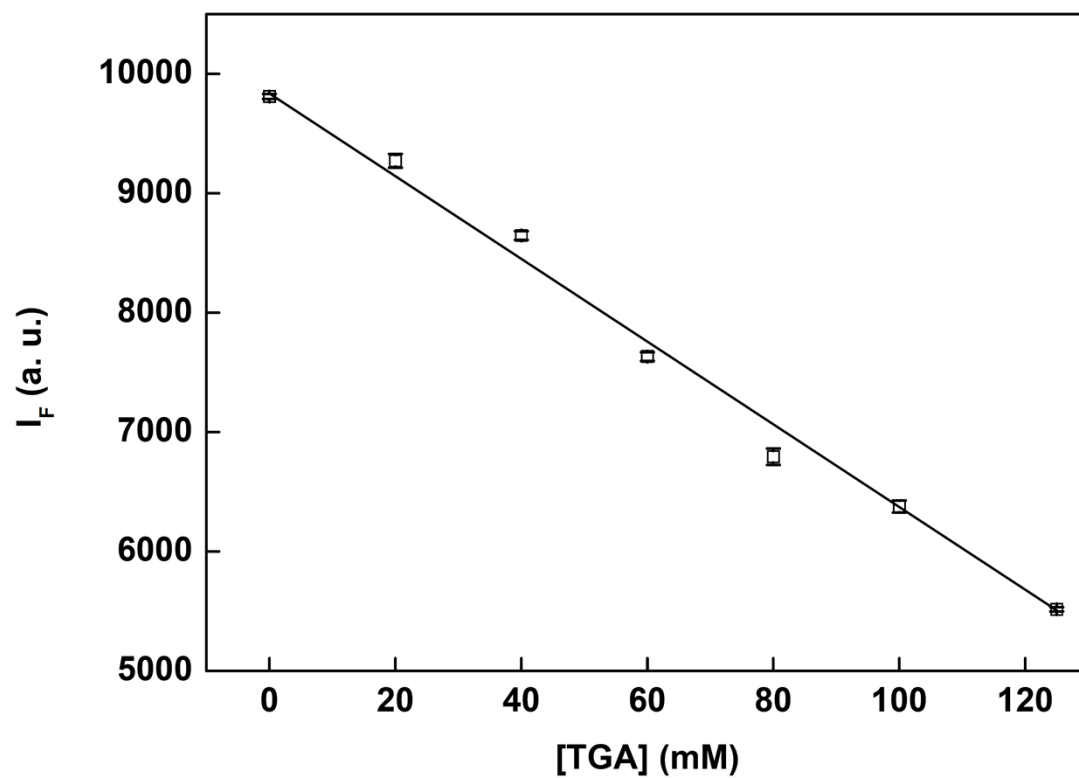

**Figure S1.** Fluorescence intensity at 455 nm of Au<sub>8</sub> clusters in the presence of different concentrations of TGA. The incubation time is 10 min.

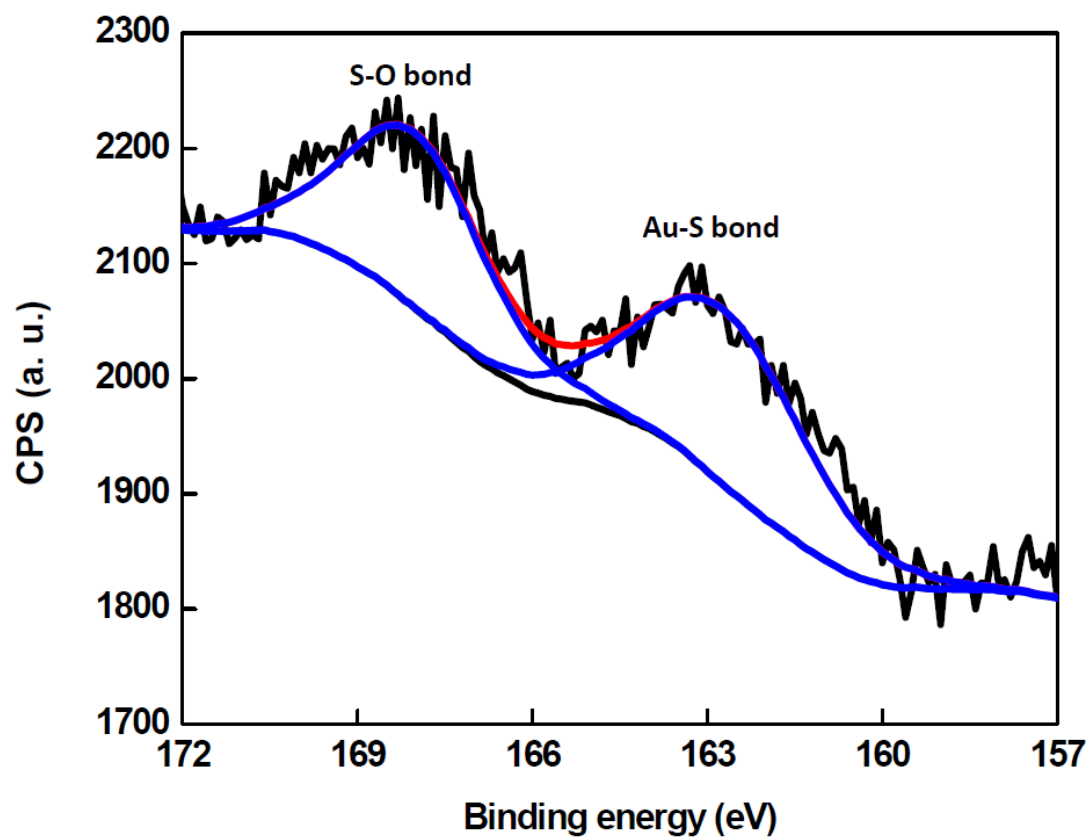

**Figure S2.** XPS spectrum of the insoluble products. The insoluble products were obtained from centrifugation of a solution containing Lys VI-stabilized Au<sub>8</sub> clusters and 125  $\mu$ M TGA. The incubation time is 10 min.

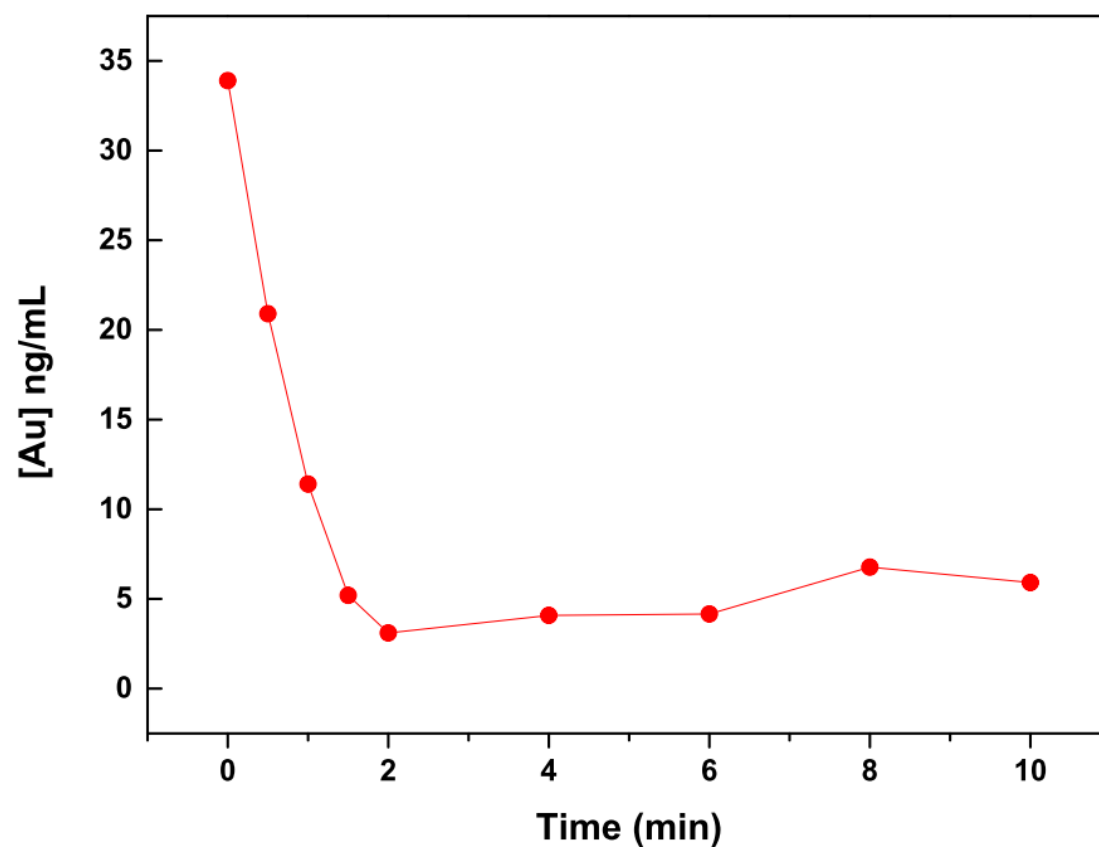

**Figure S3.** Time-course measurements of the Au concentration in the supernatant. The supernatant obtained from centrifugation of a solution containing Lys VI-stabilized Au<sub>8</sub> clusters and 125  $\mu$ M TGA.

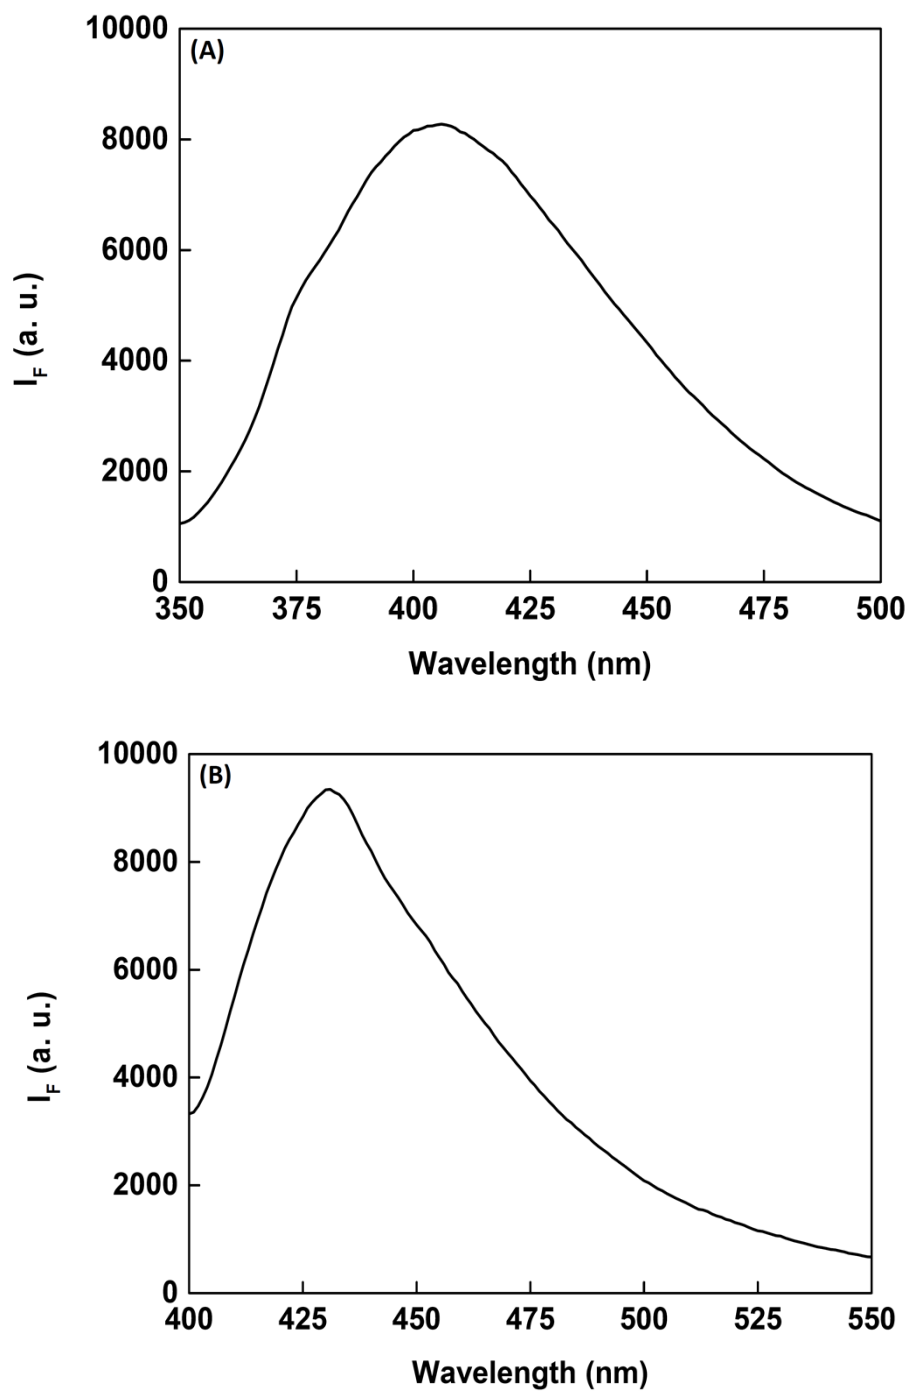

**Figure S4.** Fluorescence spectra of (A) BSA- and (B) ovalbumin-stabilized AuNCs. The excitation wavelengths are (A) 330 nm and (B) 375 nm.

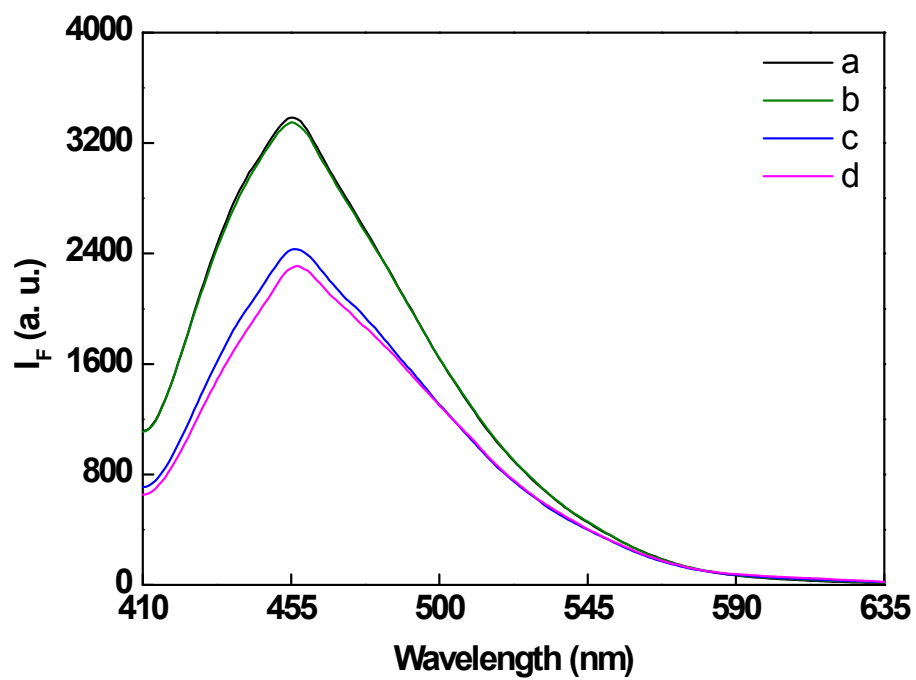

**Figure S5.** Fluorescence spectra of Lys VI-stabilized Au<sub>8</sub> clusters (a) before and (b-d) after the addition of (b) 100  $\mu$ M EtHg, (c) 100  $\mu$ M TSA, and (d) 100  $\mu$ M thimerosal. The incubation time is 20 min.

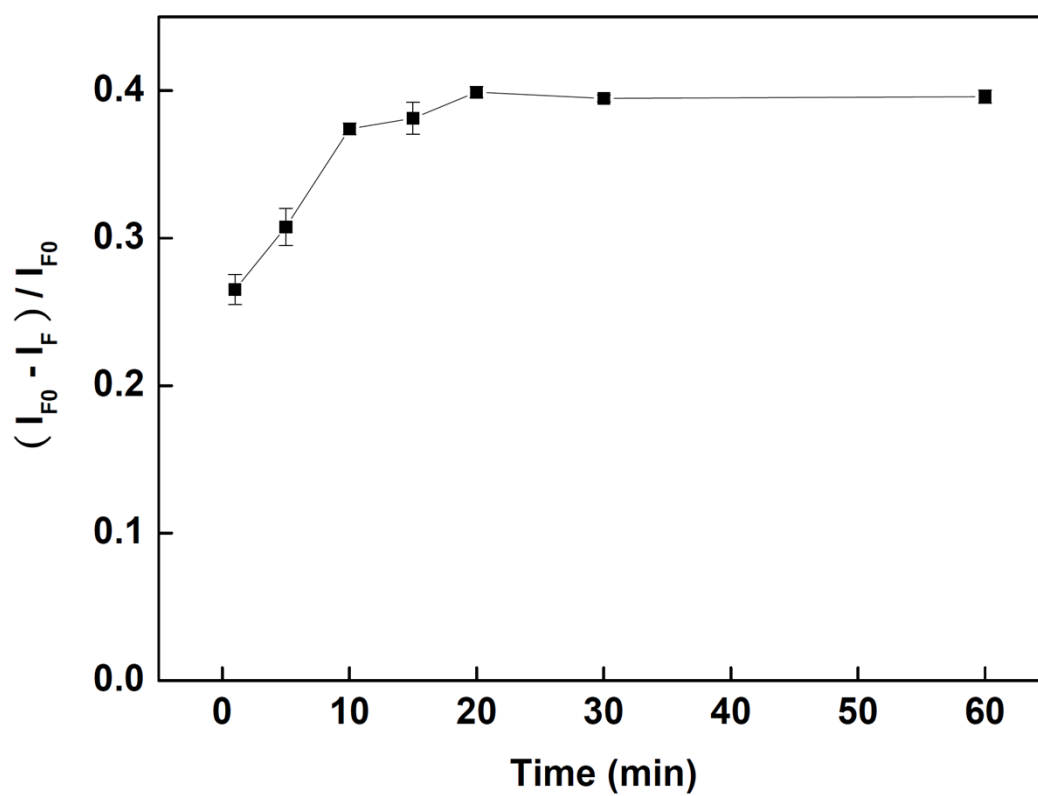

**Figure S6.** Time-course measurements of fluorescence intensity at 455 nm of a solution containing Lys VI-stabilized Au<sub>8</sub> clusters and 100  $\mu$ M thimerosal.

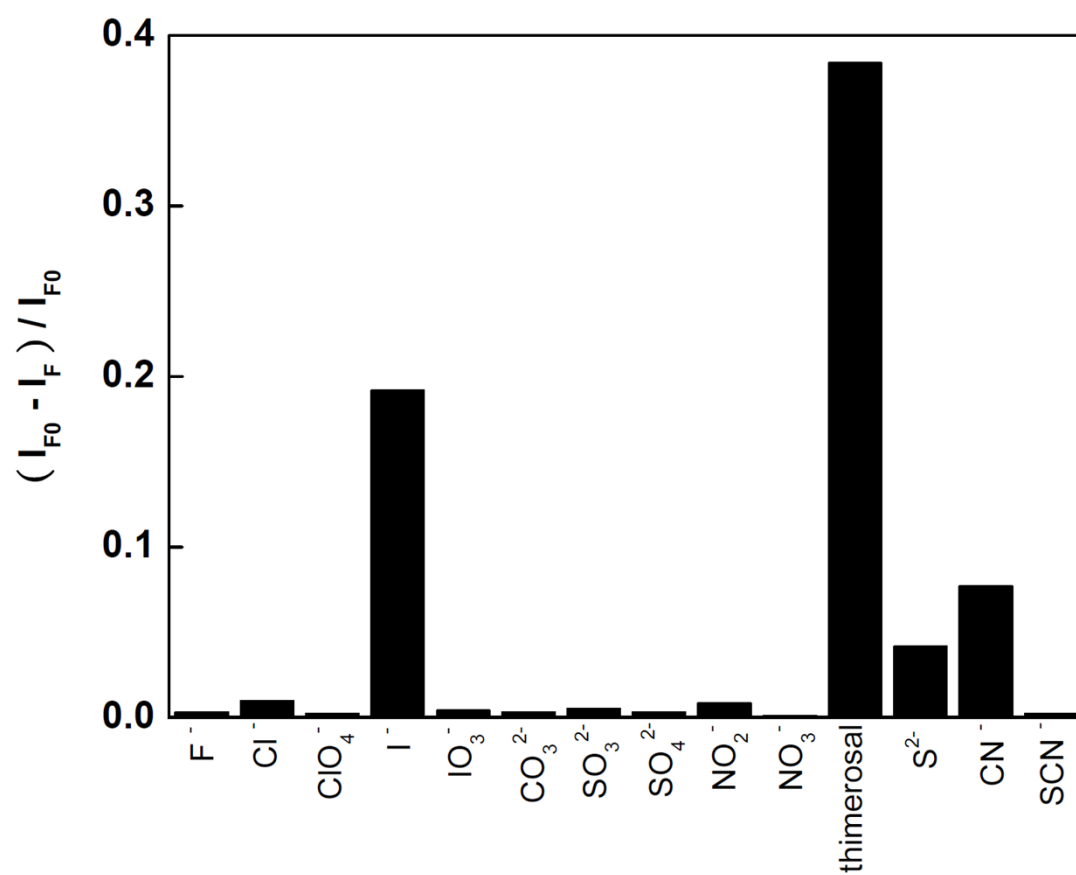

**Figure S7.** The  $(I_{F0} - I_F)/I_{F0}$  value at 455 nm of Lys VI-stabilized Au<sub>8</sub> clusters after the addition of 100  $\mu$ M anions and thimerosal. The incubation time is 20 min.



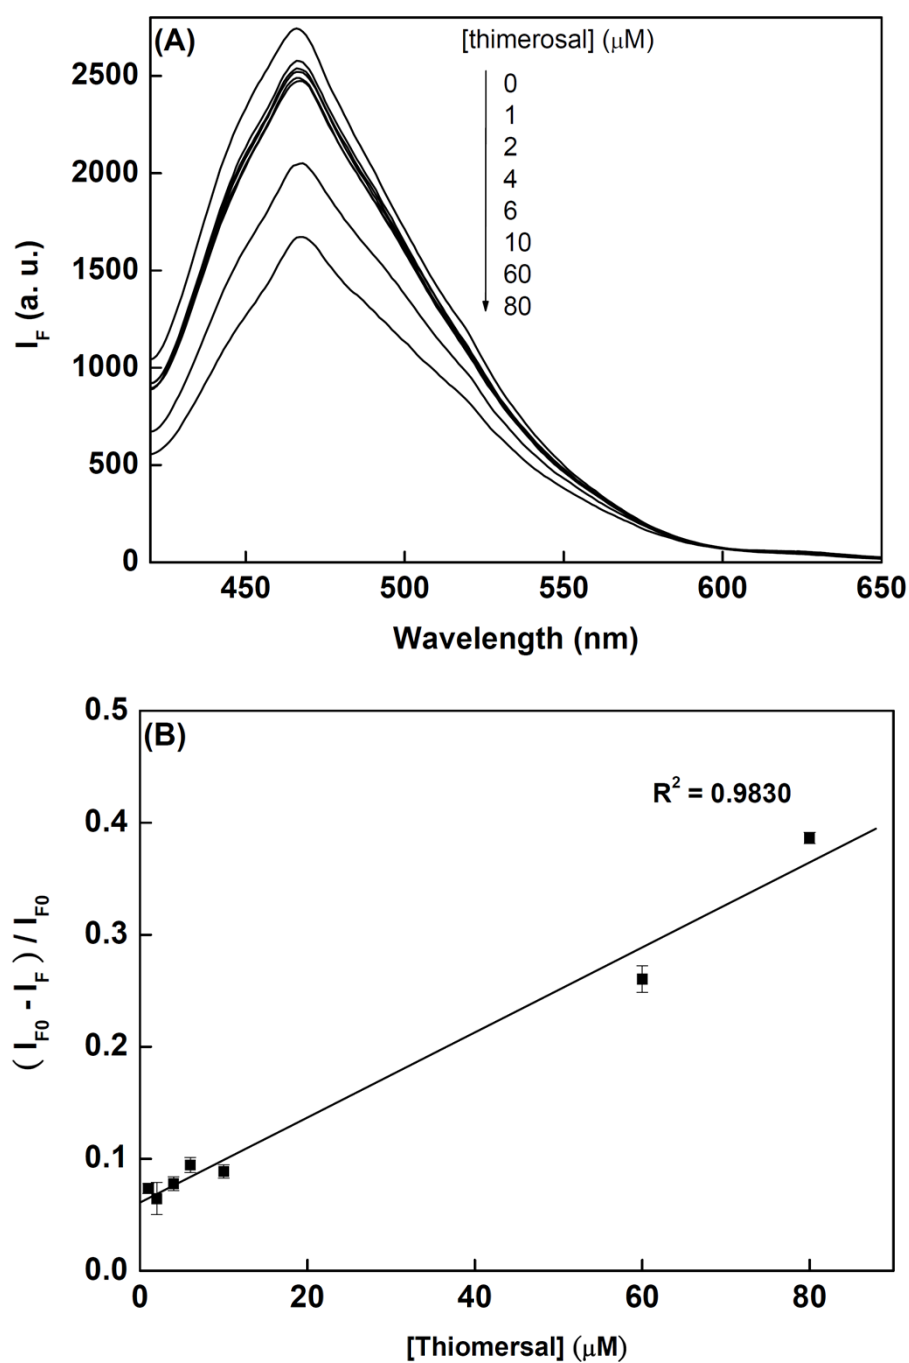

**Figure S8.** (A) Fluorescence spectra obtained from the addition of thimerosal-spiked vaccine sample to a solution of Lys VI-stabilized  $\text{Au}_8$  clusters. The incubation time is 20 min. (B) A plot of the  $(I_{F0} - I_F)/I_{F0}$  value at 455 nm *versus* the spiked concentration of thimerosal. The error bars represent standard deviations based on three independent measurements.

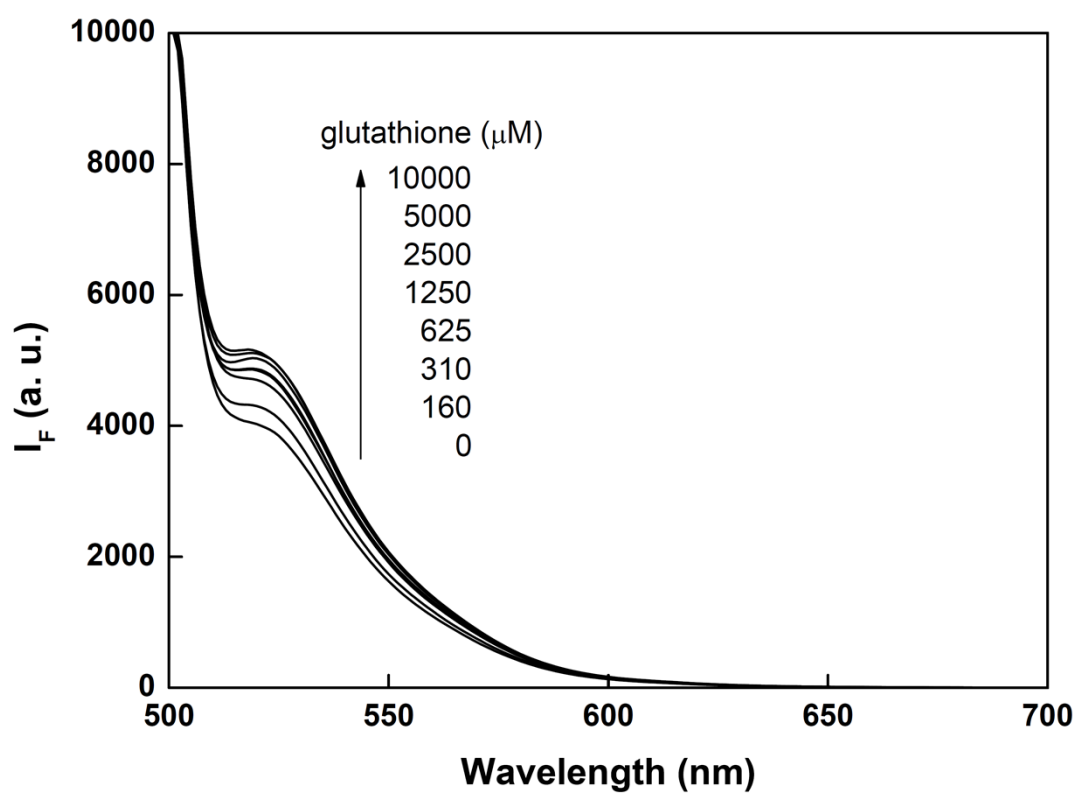

**Figure S9.** Fluorescence spectra of fluorescein obtained from the use of EnzChek Lysozyme Assay Kit for measuring the activity of Lys VI-stabilized Au8 clusters in the presence of 0–10 mM glutathione.

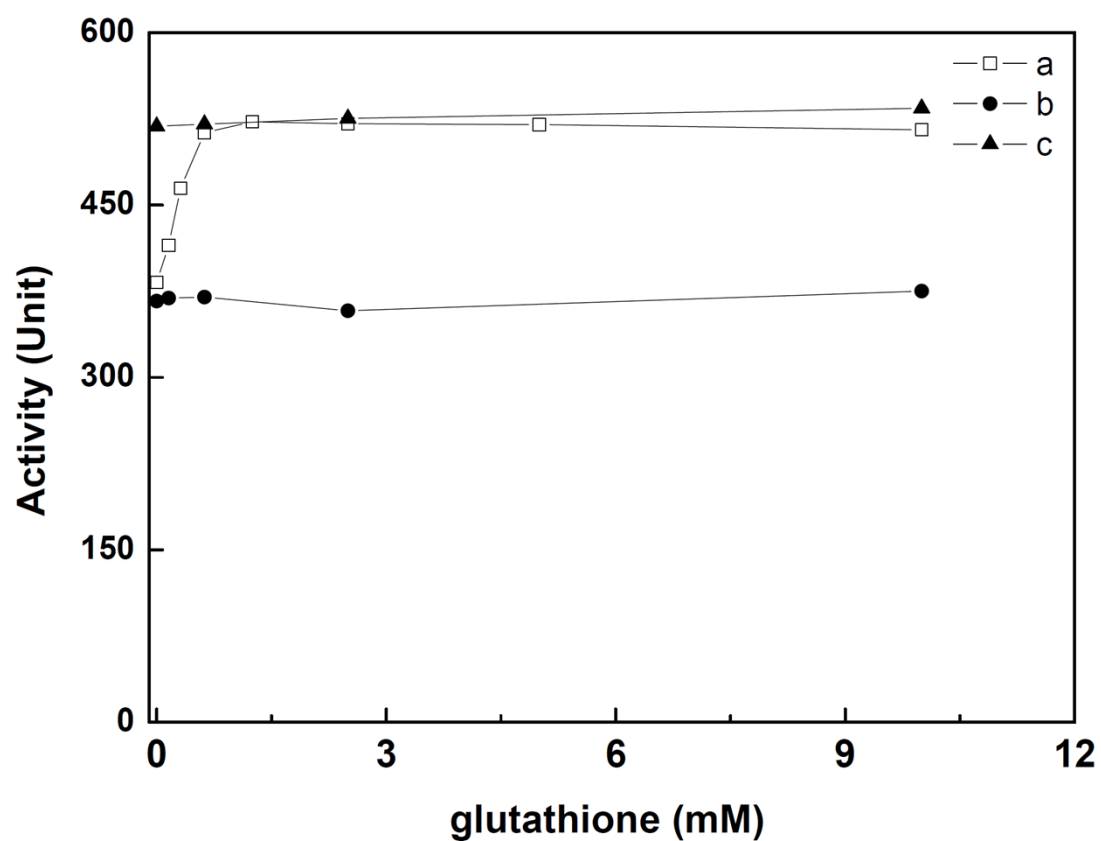

**Figure S10.** The activity of (a) Lys VI-stabilized Au<sub>8</sub> clusters at pH 2.0, (b) Lys VI at pH 2.0, and (c) Lys VI at pH 7.5 in the presence of different concentrations of glutathione.
